# Supplementary material for: Trials of transvaginal mesh devices for pelvic organ prolapse: a systematic database review of the US FDA approval process
Source: PubMed Central journal article supplement — BMJ Open. 2017 Dec 6;7(12):e017125. doi: 10.1136/bmjopen-2017-017125 (PMC5728256; doi:10.1136/bmjopen-2017-017125), 2017-12-06
Supplement: bmjopen-2017-017125.draft_revisions.pdf [file bmjopen-2017-017125.draft_revisions.pdf]

# BMJ Open

BMJ Open is committed to open peer review. As part of this commitment we make the peer review history of every article we publish publicly available.

When an article is published we post the peer reviewers' comments and the authors' responses online. We also post the versions of the paper that were used during peer review. These are the versions that the peer review comments apply to.

The versions of the paper that follow are the versions that were submitted during the peer review process. They are not the versions of record or the final published versions. They should not be cited or distributed as the published version of this manuscript.

BMJ Open is an open access journal and the full, final, typeset and author-corrected version of record of the manuscript is available on our site with no access controls, subscription charges or pay-per-view fees (<http://bmjopen.bmj.com>).

If you have any questions on BMJ Open's open peer review process please email [editorial.bmjopen@bmj.com](mailto:editorial.bmjopen@bmj.com)

Sorry, there is no peer review to display for this article

BMJ Open operates using a fully open peer review. This means that accepted papers usually have their prepublication history posted alongside them.

This prepublication history comprises all previous versions of the manuscript, the reviewers' comments, and the authors' responses to all the comments from reviewers and editors. For clinical trials, this also includes the study protocol (submitting the protocol is mandatory for all clinical trials and encouraged for all other studies at BMJ Open).

In rare instances we determine after careful consideration that we should not make certain portions of the prepublication record publicly available. For example, in cases of stigmatised illnesses we seek to protect the confidentiality of reviewers who have these illnesses. In other instances there may be legal or regulatory considerations that make it inadvisable or impermissible to make available certain parts of the prepublication record.

In all instances in which we have determined that elements of the prepublication record should not be made publicly available, we expect that authors will respect these decisions and also will not share this information.
