# Supplementary material for: Trials of transvaginal mesh devices for pelvic organ prolapse: a systematic database review of the US FDA approval process
Source: PubMed Central journal article supplement — BMJ Open. 2017 Dec 6;7(12):e017125. doi: 10.1136/bmjopen-2017-017125 (PMC5728256; doi:10.1136/bmjopen-2017-017125), 2017-12-06
Supplement: bmjopen-2017-017125supp001.pdf [file bmjopen-2017-017125supp001.pdf]

**Web Table 2: 33 companies covering 119 different US FDA 522 orders in 2012 relating to transvaginal mesh devices**

| Company                               | Number of device orders |
|---------------------------------------|-------------------------|
| 1. Acell Inc.                         | 1                       |
| 2. American Medical Systems Inc.      | 17                      |
| 3. Astora Womens Health               | 3                       |
| 4. Boston Scientific Corporation      | 10                      |
| 5. Caldera Medical Inc.               | 4                       |
| 6. Cook Biotech Inc.                  | 3                       |
| 7. Coloplast Corp                     | 14                      |
| 8. Cousin Biotech                     | 1                       |
| 9. Covidien                           | 4                       |
| 10. Cryolife Inc                      | 2                       |
| 11. C.R. Bard Inc.                    | 6                       |
| 12. Cytori Therapeutics Inc.          | 1                       |
| 13. DSM Biomedical                    | 4                       |
| 14. Ethicon Inc.                      | 5                       |
| 15. Herniamesh SRL                    | 3                       |
| 16. IBI Israel Biomedical Innovations | 2                       |
| 17. Injectx Inc.                      | 1                       |
| 18. Neomedic International            | 1                       |
| 19. Organogenesis Inc.                | 3                       |
| 20. PFM Medical                       | 1                       |
| 21. Promethean Surgical Devices Inc.  | 1                       |
| 22. Prosurg Inc.                      | 1                       |
| 23. Proxy Biomedical Ltd.             | 1                       |
| 24. RTI Biologics Inc.                | 1                       |
| 25. Smith & Nephew                    | 2                       |
| 26. Shelhigh Inc.                     | 2                       |
| 27. Sofradim Production               | 2                       |
| 28. Stellen Medical                   | 2                       |
| 29. Synovis Surgical Innovations      | 10                      |
| 30. Tei Biosciences Inc.              | 2                       |
| 31. Tepha Inc.                        | 3                       |
| 32. W.L. Gore & Associates Inc.       | 4                       |
| 33. Xylos Corporation                 | 2                       |
